# Supplementary material for: Fuzzy Entropy Analysis of the Electroencephalogram in Patients with Alzheimer’s Disease: Is the Method Superior to Sample Entropy?
Source: PubMed Central journal article supplement (PMC7512198; doi:10.3390/e20010021), 2018-01-03

*Supplementary Material Fuzzy Entropy Analysis of the Electroencephalogram in Patients with Alzheimer's Disease: Is the Method Superior to Sample Entropy? Samantha Simons, Pedro Espino and Daniel Abásolo*

**Table S1.** FuzzyEn( $n=1, m=1, r=0.1$ ) results. Significant differences ( $p < 0.01$ ) are highlighted in bold.

| Electrode  | Control subjects |               | AD patients   |               | p-value       |
|------------|------------------|---------------|---------------|---------------|---------------|
|            | Mean             | SD            | Mean          | SD            |               |
| F3         | 1.3596           | 0.4729        | 1.0902        | 0.1013        | 0.0796        |
| F4         | 1.2662           | 0.2878        | 1.2024        | 0.2862        | 0.6079        |
| F7         | 1.3730           | 0.3878        | 1.3347        | 0.3318        | 0.8058        |
| F8         | 1.3853           | 0.2915        | 1.3134        | 0.3560        | 0.6099        |
| <b>Fp1</b> | <b>1.5287</b>    | <b>0.4948</b> | <b>1.0296</b> | <b>0.2877</b> | <b>0.0090</b> |
| Fp2        | 1.4494           | 0.4282        | 1.0704        | 0.2658        | 0.0215        |
| T3         | 1.7059           | 0.5225        | 1.5984        | 0.4042        | 0.5953        |
| T4         | 1.6320           | 0.2727        | 1.7785        | 0.6767        | 0.5131        |
| T5         | 1.5151           | 0.3280        | 1.2198        | 0.3260        | 0.0470        |
| <b>T6</b>  | <b>1.6719</b>    | <b>0.4124</b> | <b>1.1845</b> | <b>0.3474</b> | <b>0.0071</b> |
| C3         | 1.7713           | 0.6258        | 1.2664        | 0.4854        | 0.0472        |
| C4         | 1.5577           | 0.5128        | 1.3606        | 0.5267        | 0.3844        |
| <b>P3</b>  | <b>1.5730</b>    | <b>0.4330</b> | <b>1.0417</b> | <b>0.3335</b> | <b>0.0043</b> |
| P4         | 1.4620           | 0.3209        | 1.0804        | 0.3679        | 0.0174        |
| O1         | 1.6214           | 0.3960        | 1.2260        | 0.3326        | 0.0197        |
| <b>O2</b>  | <b>1.5597</b>    | <b>0.2955</b> | <b>1.2001</b> | <b>0.2497</b> | <b>0.0059</b> |

**Table S2.** FuzzyEn( $n=1, m=1, r=0.15$ ) results. Significant differences ( $p < 0.01$ ) are highlighted in bold.

| Electrode  | Control subjects |               | AD patients   |               | p-value       |
|------------|------------------|---------------|---------------|---------------|---------------|
|            | Mean             | SD            | Mean          | SD            |               |
| F3         | 0.9936           | 0.3579        | 0.7879        | 0.0791        | 0.0775        |
| F4         | 0.9207           | 0.2134        | 0.8766        | 0.2153        | 0.6347        |
| F7         | 1.0105           | 0.3075        | 0.9781        | 0.2590        | 0.7921        |
| F8         | 1.0169           | 0.2207        | 0.9603        | 0.2728        | 0.5984        |
| <b>Fp1</b> | <b>1.1087</b>    | <b>0.3548</b> | <b>0.7427</b> | <b>0.2175</b> | <b>0.0085</b> |
| Fp2        | 1.0515           | 0.3244        | 0.7707        | 0.1994        | 0.0238        |
| T3         | 1.2803           | 0.4202        | 1.1956        | 0.3257        | 0.6030        |
| T4         | 1.2168           | 0.2241        | 1.3419        | 0.5598        | 0.4991        |
| T5         | 1.1260           | 0.2655        | 0.8869        | 0.2514        | 0.0423        |
| <b>T6</b>  | <b>1.2354</b>    | <b>0.3097</b> | <b>0.8651</b> | <b>0.2683</b> | <b>0.0071</b> |
| C3         | 1.3013           | 0.4738        | 0.9276        | 0.3747        | 0.0535        |
| C4         | 1.1507           | 0.3925        | 1.0038        | 0.4157        | 0.4044        |
| <b>P3</b>  | <b>1.1562</b>    | <b>0.3187</b> | <b>0.7539</b> | <b>0.2554</b> | <b>0.0039</b> |
| P4         | 1.0778           | 0.2437        | 0.7831        | 0.2767        | 0.0153        |
| O1         | 1.2141           | 0.3185        | 0.8955        | 0.2630        | 0.0187        |
| <b>O2</b>  | <b>1.1640</b>    | <b>0.2416</b> | <b>0.8754</b> | <b>0.2039</b> | <b>0.0066</b> |

**Table S3.** FuzzyEn( $n=1, m=1, r=0.2$ ) results. Significant differences ( $p<0.01$ ) are highlighted in bold.

| Electrode  | Control subjects |               | AD patients   |               | <i>p</i> -value |
|------------|------------------|---------------|---------------|---------------|-----------------|
|            | Mean             | SD            | Mean          | SD            |                 |
| F3         | 0.7810           | 0.2861        | 0.6160        | 0.0646        | 0.0769          |
| F4         | 0.7223           | 0.1700        | 0.6877        | 0.1715        | 0.6399          |
| F7         | 0.7974           | 0.2509        | 0.7705        | 0.2106        | 0.7878          |
| F8         | 0.8018           | 0.1774        | 0.7556        | 0.2198        | 0.5933          |
| <b>Fp1</b> | <b>0.8678</b>    | <b>0.2756</b> | <b>0.5802</b> | <b>0.1739</b> | <b>0.0083</b>   |
| Fp2        | 0.8237           | 0.2603        | 0.6014        | 0.1588        | 0.0253          |
| T3         | 1.0219           | 0.3474        | 0.9533        | 0.2710        | 0.6116          |
| T4         | 0.9677           | 0.1876        | 1.0748        | 0.4706        | 0.4911          |
| T5         | 0.8936           | 0.2197        | 0.6956        | 0.2031        | 0.0402          |
| <b>T6</b>  | <b>0.9774</b>    | <b>0.2477</b> | <b>0.6803</b> | <b>0.2174</b> | <b>0.0072</b>   |
| C3         | 1.0247           | 0.3761        | 0.7305        | 0.3032        | 0.0570          |
| C4         | 0.9094           | 0.3142        | 0.7935        | 0.3399        | 0.4165          |
| <b>P3</b>  | <b>0.9119</b>    | <b>0.2506</b> | <b>0.5898</b> | <b>0.2054</b> | <b>0.0036</b>   |
| P4         | 0.8517           | 0.1955        | 0.6132        | 0.2206        | 0.0143          |
| O1         | 0.9675           | 0.2631        | 0.7041        | 0.2154        | 0.0183          |
| <b>O2</b>  | <b>0.9259</b>    | <b>0.2012</b> | <b>0.6878</b> | <b>0.1696</b> | <b>0.0071</b>   |

**Table S4.** FuzzyEn( $n=1, m=1, r=0.25$ ) results. Significant differences ( $p<0.01$ ) are highlighted in bold.

| Electrode  | Control subjects |               | AD patients   |               | <i>p</i> -value |
|------------|------------------|---------------|---------------|---------------|-----------------|
|            | Mean             | SD            | Mean          | SD            |                 |
| F3         | 0.6428           | 0.2379        | 0.5055        | 0.0545        | 0.0768          |
| F4         | 0.5940           | 0.1413        | 0.5653        | 0.1422        | 0.6404          |
| F7         | 0.6578           | 0.2106        | 0.6351        | 0.1769        | 0.7870          |
| F8         | 0.6613           | 0.1482        | 0.6224        | 0.1837        | 0.5906          |
| <b>Fp1</b> | <b>0.7124</b>    | <b>0.2252</b> | <b>0.4757</b> | <b>0.1446</b> | <b>0.0082</b>   |
| Fp2        | 0.6766           | 0.2171        | 0.4928        | 0.1317        | 0.0262          |
| T3         | 0.8492           | 0.2949        | 0.7921        | 0.2313        | 0.6187          |
| T4         | 0.8025           | 0.1605        | 0.8954        | 0.4036        | 0.4862          |
| T5         | 0.7400           | 0.1865        | 0.5719        | 0.1699        | 0.0389          |
| <b>T6</b>  | <b>0.8078</b>    | <b>0.2062</b> | <b>0.5602</b> | <b>0.1823</b> | <b>0.0073</b>   |
| C3         | 0.8441           | 0.3107        | 0.6021        | 0.2540        | 0.0592          |
| C4         | 0.7508           | 0.2610        | 0.6555        | 0.2866        | 0.4243          |
| <b>P3</b>  | <b>0.7523</b>    | <b>0.2062</b> | <b>0.4840</b> | <b>0.1713</b> | <b>0.0034</b>   |
| P4         | 0.7034           | 0.1630        | 0.5037        | 0.1830        | 0.0137          |
| O1         | 0.8032           | 0.2231        | 0.5796        | 0.1817        | 0.0180          |
| <b>O2</b>  | <b>0.7678</b>    | <b>0.1715</b> | <b>0.5660</b> | <b>0.1445</b> | <b>0.0073</b>   |

**Table S5.** FuzzyEn( $n=1, m=2, r=0.1$ ) results. Significant differences ( $p<0.01$ ) are highlighted in bold.

| Electrode | Control subjects |               | AD patients   |               | <i>p</i> -value |
|-----------|------------------|---------------|---------------|---------------|-----------------|
|           | Mean             | SD            | Mean          | SD            |                 |
| F3        | 0.8233           | 0.1714        | 0.7405        | 0.0612        | 0.1472          |
| F4        | 0.8086           | 0.1345        | 0.7803        | 0.1233        | 0.6131          |
| F7        | 0.8542           | 0.1633        | 0.8376        | 0.1262        | 0.7920          |
| F8        | 0.8452           | 0.1191        | 0.8247        | 0.1390        | 0.7149          |
| Fp1       | 0.8896           | 0.1837        | 0.6943        | 0.1589        | 0.0148          |
| Fp2       | 0.8769           | 0.1744        | 0.7240        | 0.1401        | 0.0346          |
| T3        | 0.9588           | 0.1830        | 0.9331        | 0.1492        | 0.7220          |
| T4        | 0.9408           | 0.1243        | 0.9553        | 0.2227        | 0.8520          |
| T5        | 0.9108           | 0.1172        | 0.7887        | 0.1310        | 0.0321          |
| <b>T6</b> | <b>0.9626</b>    | <b>0.1732</b> | <b>0.7620</b> | <b>0.1550</b> | <b>0.0096</b>   |
| C3        | 0.9799           | 0.1718        | 0.7898        | 0.1789        | 0.0194          |
| C4        | 0.8885           | 0.1305        | 0.8147        | 0.1690        | 0.2652          |
| <b>P3</b> | <b>0.9126</b>    | <b>0.1274</b> | <b>0.6940</b> | <b>0.1158</b> | <b>0.0004</b>   |
| <b>P4</b> | <b>0.8696</b>    | <b>0.1068</b> | <b>0.7152</b> | <b>0.1359</b> | <b>0.0077</b>   |
| <b>O1</b> | <b>0.9254</b>    | <b>0.1345</b> | <b>0.7692</b> | <b>0.1119</b> | <b>0.0077</b>   |
| <b>O2</b> | <b>0.9150</b>    | <b>0.1160</b> | <b>0.7573</b> | <b>0.0970</b> | <b>0.0025</b>   |

**Table S6.** FuzzyEn( $n=1, m=2, r=0.15$ ) results. Significant differences ( $p<0.01$ ) are highlighted in bold.

| Electrode | Control subjects |               | AD patients   |               | <i>p</i> -value |
|-----------|------------------|---------------|---------------|---------------|-----------------|
|           | Mean             | SD            | Mean          | SD            |                 |
| F3        | 0.6729           | 0.1608        | 0.5872        | 0.0547        | 0.1098          |
| F4        | 0.6505           | 0.1177        | 0.6285        | 0.1134        | 0.6604          |
| F7        | 0.6909           | 0.1471        | 0.6762        | 0.1167        | 0.7980          |
| F8        | 0.6869           | 0.1098        | 0.6628        | 0.1248        | 0.6358          |
| Fp1       | 0.7254           | 0.1634        | 0.5491        | 0.1408        | 0.0135          |
| Fp2       | 0.7070           | 0.1593        | 0.5726        | 0.1277        | 0.0411          |
| T3        | 0.7989           | 0.1751        | 0.7653        | 0.1372        | 0.6222          |
| T4        | 0.7758           | 0.1104        | 0.7873        | 0.2049        | 0.8718          |
| T5        | 0.7545           | 0.1135        | 0.6329        | 0.1227        | 0.0255          |
| <b>T6</b> | <b>0.7995</b>    | <b>0.1525</b> | <b>0.6161</b> | <b>0.1420</b> | <b>0.0076</b>   |
| C3        | 0.8124           | 0.1636        | 0.6396        | 0.1649        | 0.0228          |
| C4        | 0.7365           | 0.1335        | 0.6673        | 0.1662        | 0.2944          |
| <b>P3</b> | <b>0.7550</b>    | <b>0.1232</b> | <b>0.5520</b> | <b>0.1109</b> | <b>0.0006</b>   |
| <b>P4</b> | <b>0.7204</b>    | <b>0.1001</b> | <b>0.5720</b> | <b>0.1301</b> | <b>0.0071</b>   |
| <b>O1</b> | <b>0.7757</b>    | <b>0.1332</b> | <b>0.6216</b> | <b>0.1079</b> | <b>0.0074</b>   |
| <b>O2</b> | <b>0.7578</b>    | <b>0.1074</b> | <b>0.6108</b> | <b>0.0911</b> | <b>0.0024</b>   |

**Table S7.** FuzzyEn( $n=1, m=2, r=0.2$ ) results. Significant differences ( $p<0.01$ ) are highlighted in bold.

| Electrode | Control subjects |               | AD patients   |               | <i>p</i> -value |
|-----------|------------------|---------------|---------------|---------------|-----------------|
|           | Mean             | SD            | Mean          | SD            |                 |
| F3        | 0.5658           | 0.1459        | 0.4853        | 0.0491        | 0.0983          |
| F4        | 0.5422           | 0.1026        | 0.5264        | 0.1015        | 0.7211          |
| F7        | 0.5807           | 0.1356        | 0.5661        | 0.1073        | 0.7833          |
| F8        | 0.5777           | 0.0994        | 0.5534        | 0.1123        | 0.5972          |
| Fp1       | 0.6083           | 0.1429        | 0.4529        | 0.1236        | 0.0129          |
| Fp2       | 0.5897           | 0.1436        | 0.4716        | 0.1118        | 0.0438          |
| T3        | 0.6867           | 0.1673        | 0.6505        | 0.1282        | 0.5746          |
| T4        | 0.6616           | 0.1029        | 0.6753        | 0.1970        | 0.8399          |
| T5        | 0.6430           | 0.1092        | 0.5271        | 0.1120        | 0.0232          |
| <b>T6</b> | <b>0.6811</b>    | <b>0.1347</b> | <b>0.5123</b> | <b>0.1288</b> | <b>0.0070</b>   |
| C3        | 0.6915           | 0.1572        | 0.5369        | 0.1518        | 0.0294          |
| C4        | 0.6270           | 0.1285        | 0.5650        | 0.1595        | 0.3270          |
| <b>P3</b> | <b>0.6409</b>    | <b>0.1127</b> | <b>0.4574</b> | <b>0.1023</b> | <b>0.0007</b>   |
| <b>P4</b> | <b>0.6125</b>    | <b>0.0916</b> | <b>0.4755</b> | <b>0.1188</b> | <b>0.0066</b>   |
| <b>O1</b> | <b>0.6677</b>    | <b>0.1589</b> | <b>0.5204</b> | <b>0.1019</b> | <b>0.0075</b>   |
| <b>O2</b> | <b>0.6473</b>    | <b>0.1026</b> | <b>0.5108</b> | <b>0.0861</b> | <b>0.0030</b>   |

**Table S8.** FuzzyEn( $n=1, m=2, r=0.25$ ) results. Significant differences ( $p<0.01$ ) are highlighted in bold.

| Electrode | Control subjects |               | AD patients   |               | <i>p</i> -value |
|-----------|------------------|---------------|---------------|---------------|-----------------|
|           | Mean             | SD            | Mean          | SD            |                 |
| F3        | 0.4863           | 0.1313        | 0.4128        | 0.0443        | 0.0939          |
| F4        | 0.4638           | 0.0907        | 0.4517        | 0.0908        | 0.7566          |
| F7        | 0.5001           | 0.1246        | 0.4860        | 0.0979        | 0.7703          |
| F8        | 0.4974           | 0.0898        | 0.4742        | 0.1010        | 0.5765          |
| Fp1       | 0.5213           | 0.1249        | 0.3847        | 0.1090        | 0.0128          |
| Fp2       | 0.6010           | 0.1571        | 0.5652        | 0.1192        | 0.0452          |
| T3        | 0.5757           | 0.0957        | 0.5913        | 0.1876        | 0.5537          |
| T4        | 0.5757           | 0.0957        | 0.5913        | 0.1876        | 0.8076          |
| T5        | 0.5585           | 0.1025        | 0.4506        | 0.1015        | 0.0222          |
| <b>T6</b> | <b>0.5911</b>    | <b>0.1198</b> | <b>0.4393</b> | <b>0.1165</b> | <b>0.0069</b>   |
| C3        | 0.5991           | 0.1458        | 0.4617        | 0.1387        | 0.0349          |
| C4        | 0.5438           | 0.1196        | 0.4887        | 0.1493        | 0.3514          |
| <b>P3</b> | <b>0.5546</b>    | <b>0.1013</b> | <b>0.3898</b> | <b>0.0930</b> | <b>0.0007</b>   |
| <b>P4</b> | <b>0.5309</b>    | <b>0.0831</b> | <b>0.4060</b> | <b>0.1072</b> | <b>0.0063</b>   |
| <b>O1</b> | <b>0.5842</b>    | <b>0.1214</b> | <b>0.4466</b> | <b>0.0947</b> | <b>0.0077</b>   |
| <b>O2</b> | <b>0.5636</b>    | <b>0.0966</b> | <b>0.4381</b> | <b>0.0805</b> | <b>0.0035</b>   |

**Table S9.** FuzzyEn( $n=2, m=1, r=0.1$ ) results. Significant differences ( $p<0.01$ ) are highlighted in bold.

| Electrode | Control subjects |               | AD patients   |               | <i>p</i> -value |
|-----------|------------------|---------------|---------------|---------------|-----------------|
|           | Mean             | SD            | Mean          | SD            |                 |
| F3        | 1.3286           | 0.5713        | 1.1774        | 0.2380        | 0.8182          |
| F4        | 1.2123           | 0.3400        | 1.2213        | 0.2897        | 0.9738          |
| F7        | 1.5304           | 0.5362        | 1.6788        | 0.4409        | 0.3754          |
| F8        | 1.5417           | 0.3989        | 1.6295        | 0.5307        | 0.7180          |
| Fp1       | 1.8758           | 0.8766        | 1.2847        | 0.4084        | 0.1077          |
| Fp2       | 1.7550           | 0.6921        | 1.3241        | 0.4081        | 0.1228          |
| T3        | 2.0140           | 0.7546        | 2.0202        | 0.5317        | 0.6695          |
| T4        | 1.8817           | 0.4566        | 2.3943        | 1.0586        | 0.3410          |
| T5        | 1.6875           | 0.5488        | 1.4238        | 0.3087        | 0.2505          |
| T6        | 2.1967           | 1.0107        | 1.3660        | 0.4421        | 0.0197          |
| C3        | 1.7349           | 0.8115        | 1.2220        | 0.6179        | 0.0818          |
| C4        | 1.4060           | 0.5794        | 1.3084        | 0.5845        | 0.6224          |
| <b>P3</b> | <b>1.6226</b>    | <b>0.5988</b> | <b>1.0352</b> | <b>0.3027</b> | <b>0.0078</b>   |
| P4        | 1.4989           | 0.4586        | 1.0792        | 0.4188        | 0.0138          |
| O1        | 1.7959           | 0.4461        | 1.3924        | 0.3374        | 0.0386          |
| <b>O2</b> | <b>1.7561</b>    | <b>0.2886</b> | <b>1.3667</b> | <b>0.2266</b> | <b>0.0053</b>   |

**Table S10.** FuzzyEn( $n=2, m=1, r=0.15$ ) results. Significant differences ( $p<0.01$ ) are highlighted in bold.

| Electrode | Control subjects |               | AD patients   |               | <i>p</i> -value |
|-----------|------------------|---------------|---------------|---------------|-----------------|
|           | Mean             | SD            | Mean          | SD            |                 |
| F3        | 1.0991           | 0.5110        | 0.9669        | 0.2162        | 0.8696          |
| F4        | 0.9860           | 0.2869        | 1.0050        | 0.2584        | 0.9215          |
| F7        | 1.2891           | 0.4947        | 1.4397        | 0.4199        | 0.3410          |
| F8        | 1.2918           | 0.3386        | 1.3895        | 0.4780        | 0.6695          |
| Fp1       | 1.5622           | 0.7379        | 1.0739        | 0.3854        | 0.0818          |
| Fp2       | 1.4584           | 0.5913        | 1.1009        | 0.3768        | 0.1228          |
| T3        | 1.7381           | 0.6766        | 1.7612        | 0.4851        | 0.7180          |
| T4        | 1.6144           | 0.4212        | 2.0714        | 0.9149        | 0.2244          |
| T5        | 1.4460           | 0.5085        | 1.1900        | 0.2761        | 0.2244          |
| T6        | 1.8357           | 0.7881        | 1.1443        | 0.3945        | 0.0197          |
| C3        | 1.4291           | 0.7072        | 1.0064        | 0.5480        | 0.0818          |
| C4        | 1.1624           | 0.5182        | 1.0841        | 0.5309        | 0.6695          |
| <b>P3</b> | <b>1.3490</b>    | <b>0.5190</b> | <b>0.8386</b> | <b>0.2689</b> | <b>0.0095</b>   |
| P4        | 1.2464           | 0.3828        | 0.8763        | 0.3659        | 0.0138          |
| O1        | 1.5564           | 0.4253        | 0.1708        | 0.3101        | 0.0386          |
| <b>O2</b> | <b>1.5189</b>    | <b>0.2790</b> | <b>1.1465</b> | <b>0.2176</b> | <b>0.0064</b>   |

**Table S11.** FuzzyEn( $n=2, m=1, r=0.2$ ) results. Significant differences ( $p<0.01$ ) are highlighted in bold.

| Electrode | Control subjects |               | AD patients   |               | <i>p</i> -value |
|-----------|------------------|---------------|---------------|---------------|-----------------|
|           | Mean             | SD            | Mean          | SD            |                 |
| F3        | 0.9443           | 0.4629        | 0.8264        | 0.1983        | 0.8182          |
| F4        | 0.8359           | 0.2507        | 0.8605        | 0.2339        | 0.9215          |
| F7        | 1.1278           | 0.4666        | 1.2734        | 0.4035        | 0.3410          |
| F8        | 1.1237           | 0.3023        | 1.2234        | 0.4398        | 0.5767          |
| Fp1       | 1.3560           | 0.6527        | 0.9319        | 0.3637        | 0.0818          |
| Fp2       | 1.2623           | 0.5312        | 0.9505        | 0.3505        | 0.1228          |
| T3        | 1.5510           | 0.6311        | 1.5833        | 0.4549        | 0.7180          |
| T4        | 1.4315           | 0.4010        | 1.8604        | 0.8413        | 0.2505          |
| T5        | 1.2803           | 0.4852        | 1.0303        | 0.2505        | 0.2004          |
| T6        | 1.6052           | 0.6748        | 0.9945        | 0.3625        | 0.0197          |
| C3        | 1.2296           | 0.6430        | 0.8636        | 0.4982        | 0.1077          |
| C4        | 0.9984           | 0.4713        | 0.9348        | 0.4921        | 0.6695          |
| <b>P3</b> | <b>1.1678</b>    | <b>0.4678</b> | <b>0.7094</b> | <b>0.2421</b> | <b>0.0095</b>   |
| P4        | 1.0786           | 0.3394        | 0.7435        | 0.3279        | 0.0165          |
| O1        | 1.3896           | 0.4078        | 1.0183        | 0.2876        | 0.0386          |
| <b>O2</b> | <b>1.3527</b>    | <b>0.2727</b> | <b>0.9954</b> | <b>0.2079</b> | <b>0.0064</b>   |

**Table S12.** FuzzyEn( $n=2, m=1, r=0.25$ ) results. Significant differences ( $p<0.01$ ) are highlighted in bold.

| Electrode | Control subjects |               | AD patients   |               | <i>p</i> -value |
|-----------|------------------|---------------|---------------|---------------|-----------------|
|           | Mean             | SD            | Mean          | SD            |                 |
| F3        | 0.8306           | 0.4231        | 0.7240        | 0.1831        | 0.8696          |
| F4        | 0.7276           | 0.2241        | 0.7555        | 0.2140        | 0.8182          |
| F7        | 1.0088           | 0.4441        | 1.1475        | 0.3890        | 0.3410          |
| F8        | 0.9992           | 0.2761        | 1.0982        | 0.4094        | 0.5327          |
| Fp1       | 1.2048           | 0.5899        | 0.8273        | 0.3438        | 0.0818          |
| Fp2       | 1.1187           | 0.4870        | 0.8403        | 0.3281        | 0.1228          |
| T3        | 1.4105           | 0.5978        | 1.4484        | 0.4319        | 0.7676          |
| T4        | 1.2943           | 0.3857        | 1.7046        | 0.7936        | 0.2505          |
| T5        | 1.1558           | 0.4681        | 0.9118        | 0.2295        | 0.1396          |
| T6        | 1.4386           | 0.6034        | 0.8839        | 0.3376        | 0.0278          |
| C3        | 1.0855           | 0.5945        | 0.7597        | 0.4587        | 0.0940          |
| C4        | 0.8779           | 0.4328        | 0.8259        | 0.4608        | 0.7180          |
| <b>P3</b> | <b>1.0350</b>    | <b>0.4283</b> | <b>0.6166</b> | <b>0.2203</b> | <b>0.0095</b>   |
| P4        | 0.9557           | 0.3086        | 0.6481        | 0.2980        | 0.0138          |
| O1        | 1.2626           | 0.3920        | 0.9045        | 0.2684        | 0.0328          |
| O2        | 1.2261           | 0.2669        | 0.8830        | 0.1980        | 0.0115          |

**Table S13.** FuzzyEn( $n=2, m=2, r=0.1$ ) results. Significant differences ( $p<0.01$ ) are highlighted in bold.

| Electrode | Control subjects |               | AD patients   |               | <i>p</i> -value |
|-----------|------------------|---------------|---------------|---------------|-----------------|
|           | Mean             | SD            | Mean          | SD            |                 |
| F3        | 0.9145           | 0.1808        | 0.9118        | 0.1485        | 0.8696          |
| F4        | 0.8827           | 0.1255        | 0.8926        | 0.0829        | 0.8182          |
| F7        | 1.1658           | 0.4328        | 1.1157        | 0.2937        | 0.7180          |
| F8        | 1.0458           | 0.2281        | 1.0629        | 0.2479        | 0.7676          |
| Fp1       | 1.2069           | 0.5184        | 0.9221        | 0.1473        | 0.2244          |
| Fp2       | 1.1822           | 0.4702        | 0.9907        | 0.2624        | 0.2786          |
| T3        | 1.2637           | 0.5150        | 1.2921        | 0.2857        | 0.3754          |
| T4        | 1.2066           | 0.3894        | 1.6018        | 0.7636        | 0.3410          |
| T5        | 1.1425           | 0.4386        | 0.9769        | 0.1317        | 0.2505          |
| T6        | 1.4480           | 0.9440        | 0.9692        | 0.2340        | 0.0452          |
| C3        | 1.3398           | 0.9259        | 0.8854        | 0.2368        | 0.0197          |
| C4        | 0.9369           | 0.1680        | 0.9201        | 0.2383        | 0.6224          |
| <b>P3</b> | <b>1.1001</b>    | <b>0.3404</b> | <b>0.8119</b> | <b>0.0733</b> | <b>0.0023</b>   |
| P4        | 0.9820           | 0.2022        | 0.8453        | 0.1410        | 0.0328          |
| O1        | 1.0817           | 0.1922        | 0.9127        | 0.0947        | 0.0452          |
| O2        | 1.0902           | 0.1893        | 0.9155        | 0.1120        | 0.0278          |

**Table S14.** FuzzyEn( $n=2, m=2, r=0.15$ ) results. Significant differences ( $p<0.01$ ) are highlighted in bold.

| Electrode | Control subjects |               | AD patients   |               | <i>p</i> -value |
|-----------|------------------|---------------|---------------|---------------|-----------------|
|           | Mean             | SD            | Mean          | SD            |                 |
| F3        | 0.8395           | 0.1687        | 0.8277        | 0.1161        | 0.8696          |
| F4        | 0.8206           | 0.1386        | 0.8236        | 0.0863        | 0.7180          |
| F7        | 1.0105           | 0.3040        | 1.0027        | 0.2131        | 0.6224          |
| F8        | 0.9347           | 0.1643        | 0.9594        | 0.1997        | 0.8696          |
| Fp1       | 1.0493           | 0.3667        | 0.8387        | 0.1374        | 0.2244          |
| Fp2       | 1.0309           | 0.3214        | 0.8903        | 0.1956        | 0.2505          |
| T3        | 1.1113           | 0.3607        | 1.1361        | 0.2172        | 0.4502          |
| T4        | 1.0714           | 0.2724        | 1.3341        | 0.5450        | 0.4502          |
| T5        | 1.0211           | 0.3186        | 0.8928        | 0.1062        | 0.1396          |
| T6        | 1.2304           | 0.6401        | 0.8759        | 0.1883        | 0.0328          |
| C3        | 1.1376           | 0.6044        | 0.8017        | 0.1986        | 0.0138          |
| C4        | 0.8561           | 0.1474        | 0.8378        | 0.1932        | 0.5767          |
| <b>P3</b> | <b>0.9801</b>    | <b>0.2353</b> | <b>0.7471</b> | <b>0.0777</b> | <b>0.0023</b>   |
| P4        | 0.8892           | 0.1455        | 0.7717        | 0.1289        | 0.0278          |
| O1        | 0.9773           | 0.1558        | 0.8415        | 0.0837        | 0.0452          |
| O2        | 0.9880           | 0.1447        | 0.8369        | 0.0855        | 0.0165          |

**Table S15.** FuzzyEn( $n=2, m=2, r=0.2$ ) results. Significant differences ( $p<0.01$ ) are highlighted in bold.

| Electrode | Control subjects |               | AD patients   |               | <i>p</i> -value |
|-----------|------------------|---------------|---------------|---------------|-----------------|
|           | Mean             | SD            | Mean          | SD            |                 |
| F3        | 0.7904           | 0.1714        | 0.7724        | 0.1045        | 0.8182          |
| F4        | 0.7744           | 0.1464        | 0.7751        | 0.0924        | 0.8182          |
| F7        | 0.9228           | 0.2452        | 0.9371        | 0.1727        | 0.6224          |
| F8        | 0.8704           | 0.1387        | 0.8991        | 0.1799        | 0.7676          |
| Fp1       | 0.9659           | 0.3033        | 0.7841        | 0.1373        | 0.2244          |
| Fp2       | 0.9498           | 0.2565        | 0.8280        | 0.1702        | 0.2505          |
| T3        | 1.0248           | 0.2866        | 1.0466        | 0.1824        | 0.5767          |
| T4        | 0.9932           | 0.2127        | 1.1884        | 0.4322        | 0.5327          |
| T5        | 0.9509           | 0.2573        | 0.8410        | 0.0990        | 0.2244          |
| T6        | 1.1158           | 0.4896        | 0.8179        | 0.1682        | 0.0328          |
| C3        | 1.0275           | 0.4472        | 0.7477        | 0.1876        | 0.0165          |
| C4        | 0.8053           | 0.1443        | 0.7832        | 0.1754        | 0.5327          |
| <b>P3</b> | <b>0.9114</b>    | <b>0.1925</b> | <b>0.6997</b> | <b>0.0843</b> | <b>0.0023</b>   |
| P4        | 0.8344           | 0.1240        | 0.7203        | 0.1283        | 0.0197          |
| O1        | 0.9165           | 0.1372        | 0.7968        | 0.0821        | 0.0386          |
| <b>O2</b> | <b>0.9278</b>    | <b>0.1210</b> | <b>0.7924</b> | <b>0.0749</b> | <b>0.0095</b>   |

**Table S16.** FuzzyEn( $n=2, m=2, r=0.25$ ) results. Significant differences ( $p<0.01$ ) are highlighted in bold.

| Electrode | Control subjects |               | AD patients   |               | <i>p</i> -value |
|-----------|------------------|---------------|---------------|---------------|-----------------|
|           | Mean             | SD            | Mean          | SD            |                 |
| F3        | 0.7519           | 0.1766        | 0.7296        | 0.1002        | 0.8182          |
| F4        | 0.7351           | 0.1488        | 0.7356        | 0.0976        | 0.8182          |
| F7        | 0.8631           | 0.2144        | 0.8912        | 0.1504        | 0.4905          |
| F8        | 0.8254           | 0.1276        | 0.8569        | 0.1707        | 0.7180          |
| Fp1       | 0.9115           | 0.2747        | 0.7428        | 0.1403        | 0.1783          |
| Fp2       | 0.8959           | 0.2268        | 0.7814        | 0.1593        | 0.2244          |
| T3        | 0.9669           | 0.2455        | 0.9868        | 0.1624        | 0.5327          |
| T4        | 0.9394           | 0.1783        | 1.0950        | 0.3640        | 0.5767          |
| T5        | 0.9025           | 0.2215        | 0.8024        | 0.0976        | 0.2244          |
| T6        | 1.0431           | 0.4020        | 0.7753        | 0.1586        | 0.0235          |
| C3        | 0.9531           | 0.3585        | 0.7065        | 0.1855        | 0.0278          |
| C4        | 0.7665           | 0.1465        | 0.7411        | 0.1685        | 0.6224          |
| <b>P3</b> | <b>0.8632</b>    | <b>0.1749</b> | <b>0.6606</b> | <b>0.0901</b> | <b>0.0023</b>   |
| P4        | 0.7948           | 0.1164        | 0.6793        | 0.1309        | 0.0165          |
| O1        | 0.8748           | 0.1280        | 0.7629        | 0.0840        | 0.0386          |
| <b>O2</b> | <b>0.8858</b>    | <b>0.1077</b> | <b>0.7570</b> | <b>0.0711</b> | <b>0.0078</b>   |



**Table S17.** FuzzyEn( $n=3, m=1, r=0.1$ ) results. Significant differences ( $p<0.01$ ) are highlighted in bold.

| Electrode | Control subjects |               | AD patients   |               | <i>p</i> -value |
|-----------|------------------|---------------|---------------|---------------|-----------------|
|           | Mean             | SD            | Mean          | SD            |                 |
| F3        | 1.2795           | 0.5952        | 1.1876        | 0.3097        | 0.8696          |
| F4        | 1.1558           | 0.3534        | 1.1981        | 0.2958        | 0.7180          |
| F7        | 1.6039           | 0.6476        | 1.7706        | 0.4828        | 0.2786          |
| F8        | 1.6591           | 0.6648        | 1.7308        | 0.6521        | 0.6695          |
| Fp1       | 2.2795           | 1.7058        | 1.3682        | 0.4450        | 0.2244          |
| Fp2       | 2.0961           | 1.4025        | 1.4049        | 0.4612        | 0.1396          |
| T3        | 2.3054           | 1.3268        | 2.2791        | 0.7874        | 0.7180          |
| T4        | 2.0778           | 0.8977        | 3.5472        | 3.3659        | 0.3088          |
| T5        | 1.8327           | 1.0390        | 1.4781        | 0.3261        | 0.4502          |
| T6        | 3.7203           | 4.4851        | 1.4424        | 0.5738        | 0.0278          |
| C3        | 1.7926           | 1.0970        | 1.1908        | 0.7139        | 0.1396          |
| C4        | 1.3108           | 0.5924        | 1.2631        | 0.6337        | 0.7180          |
| P3        | 1.6931           | 0.8110        | 1.0122        | 0.2943        | 0.0197          |
| P4        | 1.5869           | 0.8488        | 1.0635        | 0.4549        | 0.0452          |
| O1        | 1.8168           | 0.4765        | 1.4167        | 0.3407        | 0.0452          |
| <b>O2</b> | <b>1.7840</b>    | <b>0.3225</b> | <b>1.3947</b> | <b>0.2360</b> | <b>0.0064</b>   |

**Table S18.** FuzzyEn( $n=3, m=1, r=0.15$ ) results. Significant differences ( $p<0.01$ ) are highlighted in bold.

| Electrode | Control subjects |               | AD patients   |               | <i>p</i> -value |
|-----------|------------------|---------------|---------------|---------------|-----------------|
|           | Mean             | SD            | Mean          | SD            |                 |
| F3        | 1.1201           | 0.5553        | 1.0385        | 0.2912        | 0.8696          |
| F4        | 1.0004           | 0.3195        | 1.0491        | 0.2805        | 0.6695          |
| F7        | 1.4066           | 0.5804        | 1.6041        | 0.4615        | 0.2244          |
| F8        | 1.4397           | 0.5075        | 1.5529        | 0.5864        | 0.5767          |
| Fp1       | 1.9183           | 1.2542        | 0.2165        | 0.4342        | 0.2244          |
| Fp2       | 1.7667           | 1.0223        | 1.2466        | 0.4424        | 0.1396          |
| T3        | 2.0189           | 1.0489        | 2.0348        | 0.6574        | 0.6695          |
| T4        | 1.8304           | 0.7037        | 2.9423        | 2.4098        | 0.3088          |
| T5        | 1.6158           | 0.8476        | 1.3122        | 0.2966        | 0.3754          |
| T6        | 2.9388           | 3.0736        | 1.2715        | 0.4905        | 0.0278          |
| C3        | 1.5203           | 0.8795        | 1.0323        | 0.6372        | 0.1396          |
| C4        | 1.1403           | 0.5479        | 1.1022        | 0.5821        | 0.8182          |
| P3        | 1.4532           | 0.6653        | 0.8738        | 0.2764        | 0.0235          |
| P4        | 1.3617           | 0.6350        | 0.9160        | 0.4076        | 0.0527          |
| O1        | 1.6467           | 0.4579        | 1.2669        | 0.3250        | 0.0452          |
| <b>O2</b> | <b>1.6200</b>    | <b>0.3068</b> | <b>1.2430</b> | <b>0.2292</b> | <b>0.0053</b>   |

**Table S19.** FuzzyEn( $n=3, m=1, r=0.2$ ) results. Significant differences ( $p<0.01$ ) are highlighted in bold.

| Electrode | Control subjects |               | AD patients   |               | <i>p</i> -value |
|-----------|------------------|---------------|---------------|---------------|-----------------|
|           | Mean             | SD            | Mean          | SD            |                 |
| F3        | 1.0105           | 0.5254        | 0.9365        | 0.2790        | 0.8696          |
| F4        | 0.8930           | 0.2948        | 0.9455        | 0.2683        | 0.6695          |
| F7        | 1.2785           | 0.5463        | 1.4882        | 0.4489        | 0.2244          |
| F8        | 1.2994           | 0.4333        | 1.4323        | 0.5499        | 0.5327          |
| Fp1       | 1.7041           | 1.0407        | 1.1118        | 0.4255        | 0.2244          |
| Fp2       | 1.5710           | 0.8456        | 1.1369        | 0.4291        | 0.1580          |
| T3        | 1.8423           | 0.9146        | 1.8804        | 0.5945        | 0.6695          |
| T4        | 1.6725           | 0.6146        | 2.6075        | 1.9381        | 0.3410          |
| T5        | 1.4766           | 0.7531        | 1.1973        | 0.2783        | 0.3410          |
| T6        | 2.5142           | 2.3735        | 1.1568        | 0.4478        | 0.0328          |
| C3        | 1.3501           | 0.7792        | 0.9270        | 0.5912        | 0.1580          |
| C4        | 1.0242           | 0.5167        | 0.9931        | 0.5502        | 0.8182          |
| P3        | 1.3016           | 0.5947        | 0.7789        | 0.2620        | 0.0235          |
| P4        | 1.2189           | 0.5323        | 0.8166        | 0.3782        | 0.0613          |
| O1        | 1.5303           | 0.4463        | 1.1608        | 0.3125        | 0.0527          |
| <b>O2</b> | <b>1.5052</b>    | <b>0.2998</b> | <b>1.1367</b> | <b>0.2250</b> | <b>0.0035</b>   |

**Table S20.** FuzzyEn( $n=3, m=1, r=0.25$ ) results. Significant differences ( $p<0.01$ ) are highlighted in bold.

| Electrode | Control subjects |               | AD patients   |               | <i>p</i> -value |
|-----------|------------------|---------------|---------------|---------------|-----------------|
|           | Mean             | SD            | Mean          | SD            |                 |
| F3        | 0.9276           | 0.5006        | 0.8599        | 0.2694        | 0.8696          |
| F4        | 0.8121           | 0.2754        | 0.8669        | 0.2580        | 0.5327          |
| F7        | 1.1848           | 0.5247        | 1.3995        | 0.4400        | 0.1783          |
| F8        | 1.1975           | 0.3901        | 1.3413        | 0.5247        | 0.4905          |
| Fp1       | 1.5558           | 0.9175        | 1.0324        | 0.4177        | 0.2244          |
| Fp2       | 1.4354           | 0.7457        | 1.0535        | 0.4180        | 0.1580          |
| T3        | 1.7165           | 0.8356        | 1.7686        | 0.5567        | 0.6695          |
| T4        | 1.5575           | 0.5648        | 2.3873        | 1.6587        | 0.3088          |
| T5        | 1.3751           | 0.6966        | 1.1097        | 0.2647        | 0.2786          |
| T6        | 2.2395           | 1.9568        | 1.0711        | 0.4208        | 0.0328          |
| C3        | 1.2285           | 0.7202        | 0.8492        | 0.5582        | 0.1580          |
| C4        | 0.9370           | 0.4919        | 0.9116        | 0.5270        | 0.8696          |
| P3        | 1.1925           | 0.5513        | 0.7078        | 0.2499        | 0.0235          |
| P4        | 1.1157           | 0.4719        | 0.7427        | 0.3566        | 0.0613          |
| O1        | 1.4416           | 0.4375        | 1.0790        | 0.3020        | 0.0613          |
| <b>O2</b> | <b>1.4169</b>    | <b>0.2959</b> | <b>1.0554</b> | <b>0.2217</b> | <b>0.0053</b>   |

**Table S21.** FuzzyEn( $n=3, m=2, r=0.1$ ) results.

| Electrode | Control subjects |        | AD patients |        | <i>p</i> -value |
|-----------|------------------|--------|-------------|--------|-----------------|
|           | Mean             | SD     | Mean        | SD     |                 |
| F3        | 0.9753           | 0.3331 | 1.0884      | 0.6098 | 0.6224          |
| F4        | 0.8696           | 0.1222 | 0.8981      | 0.0859 | 0.5767          |
| F7        | 1.9259           | 1.6976 | 1.4645      | 0.9514 | 0.9738          |
| F8        | 1.5020           | 1.1510 | 1.3010      | 0.7338 | 0.8696          |
| Fp1       | 2.4349           | 3.1358 | 0.9939      | 0.1776 | 0.4118          |
| Fp2       | 2.3398           | 2.9058 | 1.5332      | 1.8197 | 0.3754          |
| T3        | 2.2397           | 3.0194 | 2.1321      | 1.6342 | 0.2004          |
| T4        | 1.9524           | 2.2998 | 5.0861      | 6.1328 | 0.2004          |
| T5        | 2.0593           | 3.2465 | 1.1593      | 0.6239 | 0.4118          |
| T6        | 5.0072           | 9.6638 | 1.1840      | 0.7904 | 0.0940          |
| C3        | 2.7720           | 4.6907 | 0.9625      | 0.4422 | 0.0527          |
| C4        | 0.9799           | 0.3254 | 1.0061      | 0.5250 | 0.7676          |
| P3        | 1.6640           | 1.5469 | 0.8184      | 0.0753 | 0.0165          |
| P4        | 1.2381           | 0.8679 | 0.8977      | 0.2522 | 0.1077          |
| O1        | 1.1726           | 0.2993 | 0.9352      | 0.1046 | 0.0452          |
| O2        | 1.1861           | 0.3503 | 1.0092      | 0.3432 | 0.0527          |

**Table S22.** FuzzyEn( $n=3, m=2, r=0.15$ ) results.

| Electrode | Control subjects |        | AD patients |        | <i>p</i> -value |
|-----------|------------------|--------|-------------|--------|-----------------|
|           | Mean             | SD     | Mean        | SD     |                 |
| F3        | 0.8971           | 0.2471 | 0.9694      | 0.4126 | 0.7676          |
| F4        | 0.8309           | 0.1270 | 0.8495      | 0.0805 | 0.6695          |
| F7        | 1.5421           | 1.1410 | 1.2631      | 0.6605 | 0.8182          |
| F8        | 1.2589           | 0.7668 | 1.1475      | 0.5129 | 0.7180          |
| Fp1       | 1.8772           | 2.0846 | 0.9268      | 0.1535 | 0.3410          |
| Fp2       | 1.8166           | 1.9253 | 1.2782      | 1.2109 | 0.2786          |
| T3        | 1.7946           | 2.0251 | 1.7405      | 1.1055 | 0.2004          |
| T4        | 1.5997           | 1.5521 | 3.7076      | 4.1414 | 0.2004          |
| T5        | 1.6593           | 2.2063 | 1.0350      | 0.4208 | 0.4118          |
| T6        | 3.6236           | 6.4546 | 1.0482      | 0.5434 | 0.0613          |
| C3        | 2.0999           | 3.1130 | 0.8718      | 0.3255 | 0.0386          |
| C4        | 0.8977           | 0.2378 | 0.9178      | 0.3790 | 0.7676          |
| P3        | 1.3704           | 1.0281 | 0.7786      | 0.0714 | 0.0138          |
| P4        | 1.0747           | 0.5763 | 0.8318      | 0.1927 | 0.0818          |
| O1        | 1.0685           | 0.2420 | 0.8778      | 0.0918 | 0.0386          |
| O2        | 1.0822           | 0.2640 | 0.9245      | 0.2356 | 0.0527          |

**Table S23.** FuzzyEn( $n=3, m=2, r=0.2$ ) results. Significant differences ( $p<0.01$ ) are highlighted in bold.

| Electrode | Control subjects |               | AD patients   |               | <i>p</i> -value |
|-----------|------------------|---------------|---------------|---------------|-----------------|
|           | Mean             | SD            | Mean          | SD            |                 |
| F3        | 0.8522           | 0.2122        | 0.9025        | 0.3158        | 0.7676          |
| F4        | 0.8046           | 0.1341        | 0.8185        | 0.0803        | 0.5767          |
| F7        | 1.3424           | 0.8625        | 1.1553        | 0.5138        | 0.8696          |
| F8        | 1.1309           | 0.5748        | 1.0623        | 0.4035        | 0.7180          |
| Fp1       | 1.5943           | 1.5606        | 0.8845        | 0.1411        | 0.3754          |
| Fp2       | 1.5488           | 1.4350        | 1.1442        | 0.9083        | 0.2786          |
| T3        | 1.5631           | 1.5281        | 1.5331        | 0.8404        | 0.2244          |
| T4        | 1.4145           | 1.1752        | 3.0055        | 3.1414        | 0.2505          |
| T5        | 1.4509           | 1.6829        | 0.9674        | 0.3202        | 0.3088          |
| T6        | 2.9258           | 4.8485        | 0.9725        | 0.4220        | 0.0452          |
| C3        | 1.7606           | 2.3232        | 0.8185        | 0.2711        | 0.0386          |
| C4        | 0.8509           | 0.1995        | 0.8657        | 0.3073        | 0.8182          |
| <b>P3</b> | <b>1.2184</b>    | <b>0.7690</b> | <b>0.7511</b> | <b>0.0720</b> | <b>0.0095</b>   |
| P4        | 0.9877           | 0.4326        | 0.7914        | 0.1662        | 0.0818          |
| O1        | 1.0068           | 0.2099        | 0.8434        | 0.0845        | 0.0527          |
| O2        | 1.0214           | 0.2199        | 0.8763        | 0.1818        | 0.0452          |

**Table S24.** FuzzyEn( $n=3, m=2, r=0.25$ ) results. Significant differences ( $p<0.01$ ) are highlighted in bold.

| Electrode | Control subjects |               | AD patients   |               | <i>p</i> -value |
|-----------|------------------|---------------|---------------|---------------|-----------------|
|           | Mean             | SD            | Mean          | SD            |                 |
| F3        | 0.8214           | 0.1967        | 0.8578        | 0.2592        | 0.8182          |
| F4        | 0.7838           | 0.1403        | 0.7954        | 0.0820        | 0.5767          |
| F7        | 1.2182           | 0.6957        | 1.0867        | 0.4252        | 0.6695          |
| F8        | 1.0505           | 0.4602        | 1.0066        | 0.3391        | 0.7180          |
| Fp1       | 1.4224           | 1.2472        | 0.8538        | 0.1342        | 0.3754          |
| Fp2       | 1.3847           | 1.1412        | 1.0600        | 0.7281        | 0.3088          |
| T3        | 1.4193           | 1.2300        | 1.4022        | 0.6810        | 0.2505          |
| T4        | 1.2986           | 0.9476        | 2.5775        | 2.5389        | 0.3754          |
| T5        | 1.3213           | 1.3671        | 0.9238        | 0.2607        | 0.3754          |
| T6        | 2.5040           | 3.8842        | 0.9227        | 0.3508        | 0.0328          |
| C3        | 1.5543           | 1.8485        | 0.7818        | 0.2420        | 0.0613          |
| C4        | 0.8188           | 0.1801        | 0.8294        | 0.2660        | 0.8182          |
| <b>P3</b> | <b>1.1238</b>    | <b>0.6146</b> | <b>0.7294</b> | <b>0.0743</b> | <b>0.0078</b>   |
| P4        | 0.9321           | 0.3479        | 0.7622        | 0.1529        | 0.0613          |
| O1        | 0.9649           | 0.1889        | 0.8197        | 0.0805        | 0.0818          |
| O2        | 0.9804           | 0.1925        | 0.8439        | 0.1494        | 0.0386          |

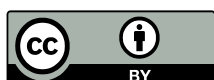

Supplement: entropy-20-00021-s001.pdf [file entropy-20-00021-s001.pdf]
